# Supplementary material for: Pd–Zn nanocrystals for highly efficient formic acid oxidation
Source: Royal Society of Chemistry journal article supplement (doi:10.1039/c8cy01503a), 2018-01-01
Supplement: c8cy01503a1.pdf [file c8cy01503a1.pdf]

## Supporting Information

### Pd-Zn Nanocrystals for High-Efficient Formic Acid Oxidation

Xinran Zhang,<sup>a</sup> Hongsheng Fan,<sup>a</sup> Jinlong Zheng,<sup>b</sup> Sibin Duan,<sup>b</sup> Yunxia Huang,<sup>a</sup> Yimin Cui<sup>\*a</sup> and Rongming Wang<sup>\*b</sup>

<sup>a</sup> Department of Physics, Beihang University, Beijing 100191, P. R. China

<sup>b</sup> Beijing Advanced Innovation Center of Materials Genome Engineering, and Beijing Key Laboratory for Magneto-Photoelectrical Composite and Interface Science, School of Mathematics and Physics, University of Science and Technology Beijing, Beijing 100083, R. P. China.

\*Corresponding author. E-mail: rmwang@ustb.edu.cn, E-mail: cuiym@buaa.edu.cn

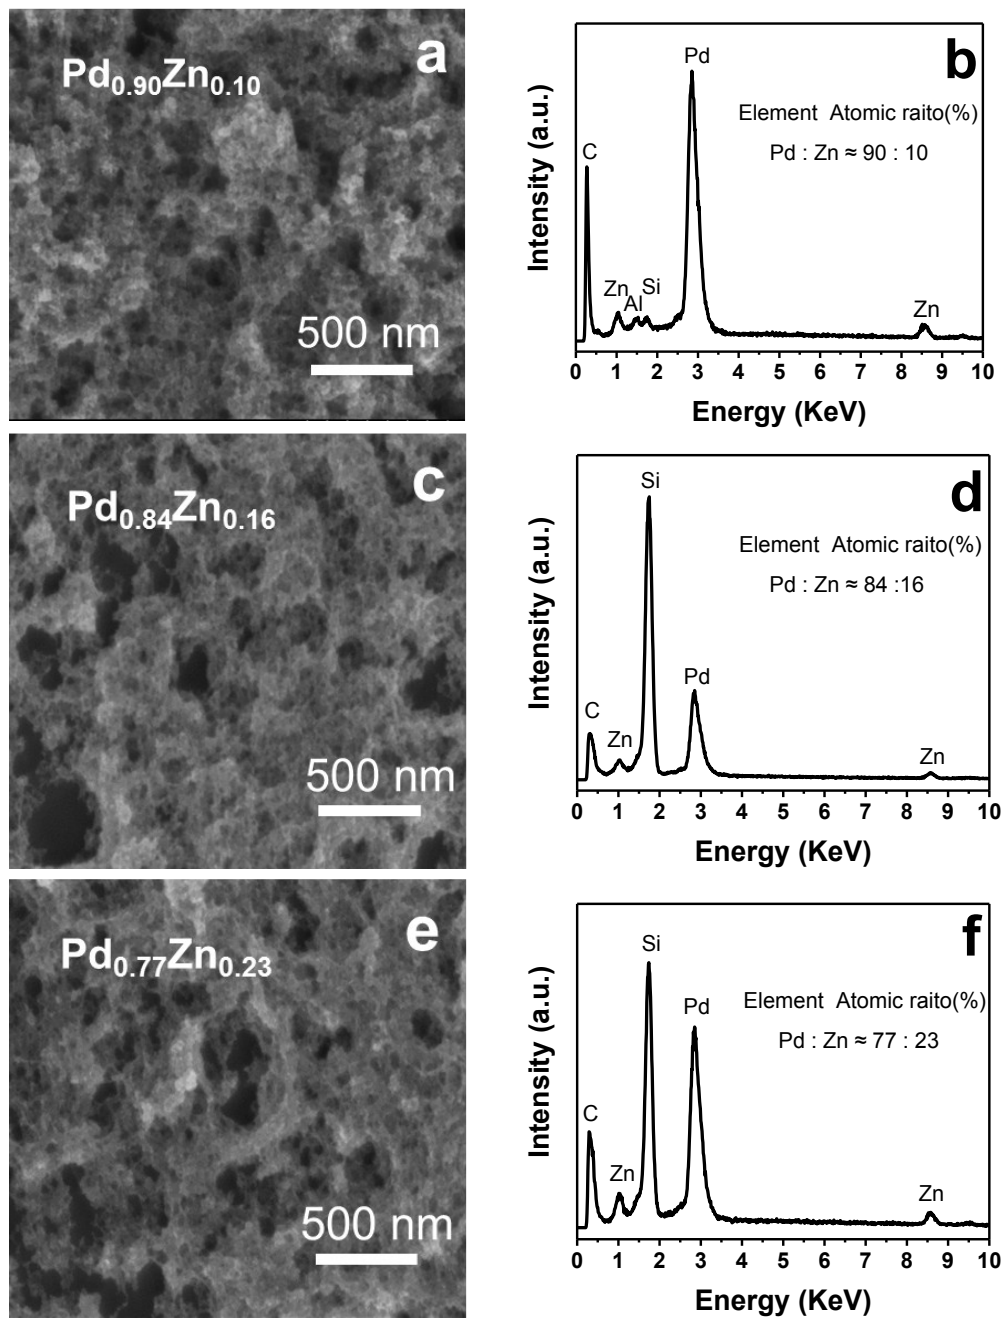

**Fig. S1** SEM images and EDS spectral of the series of  $\text{Pd}_x\text{Zn}_{1-x}$  NCs, (a) and (b)  $\text{Pd}_{0.90}\text{Zn}_{0.10}$ , (c) and (d)  $\text{Pd}_{0.84}\text{Zn}_{0.16}$ , (e) and (f)  $\text{Pd}_{0.77}\text{Zn}_{0.23}$ .

**Table S1** Pd/Zn Atomic Ratios (%) for the series of Pd<sub>x</sub>Zn<sub>1-x</sub> NCs determined by ICP-MS and EDS.

| <b>samples</b> | <b>Pd<sub>0.90</sub>Zn<sub>0.10</sub></b> | <b>Pd<sub>0.84</sub>Zn<sub>0.16</sub></b> | <b>Pd<sub>0.77</sub>Zn<sub>0.23</sub></b> |
|----------------|-------------------------------------------|-------------------------------------------|-------------------------------------------|
| ICP-MS         | 89.7/10.3                                 | 83.7/16.3                                 | 76.8/23.2                                 |
| EDS            | 90.1/9.9                                  | 82.81/17.9                                | 77.5/22.5                                 |

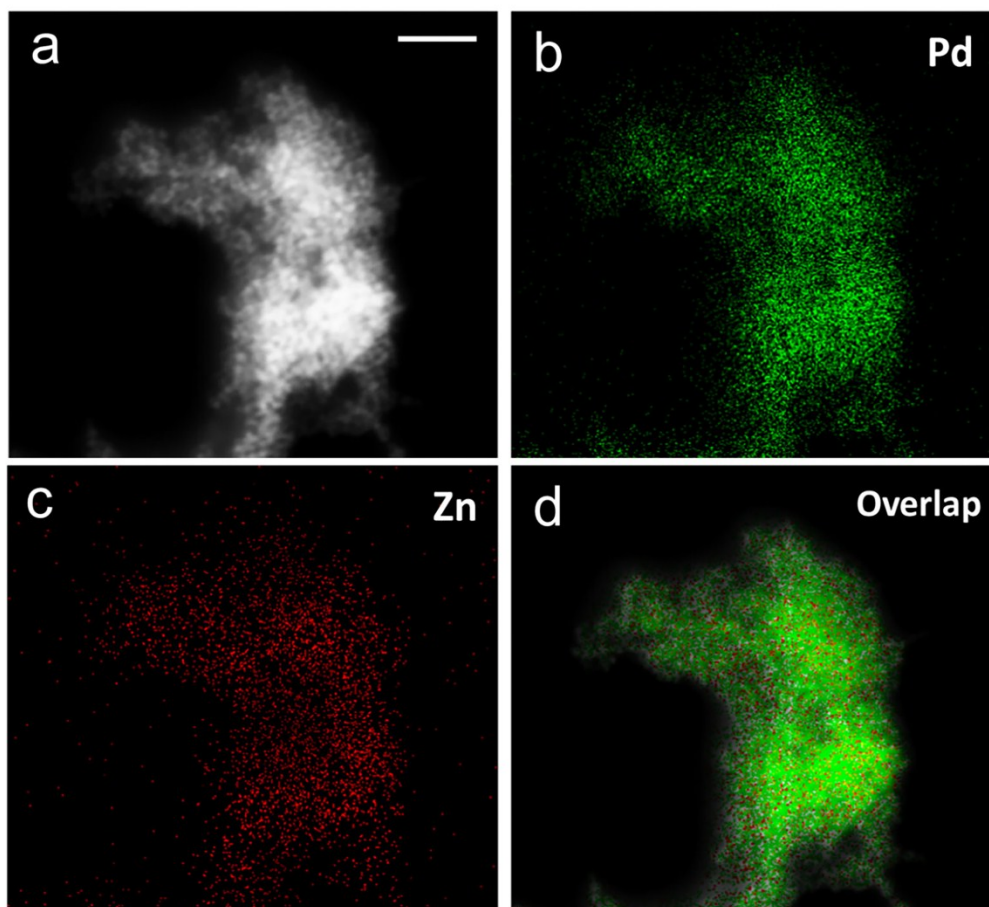

**Fig. S2** (a) HAADF-STEM image of  $\text{Pd}_{0.90}\text{Zn}_{0.10}$ , (b) Pd mapping in green, (c) Zn mapping in red, and (d) Overlapped mapping of Pd and Zn. Scale bar: 200 nm.

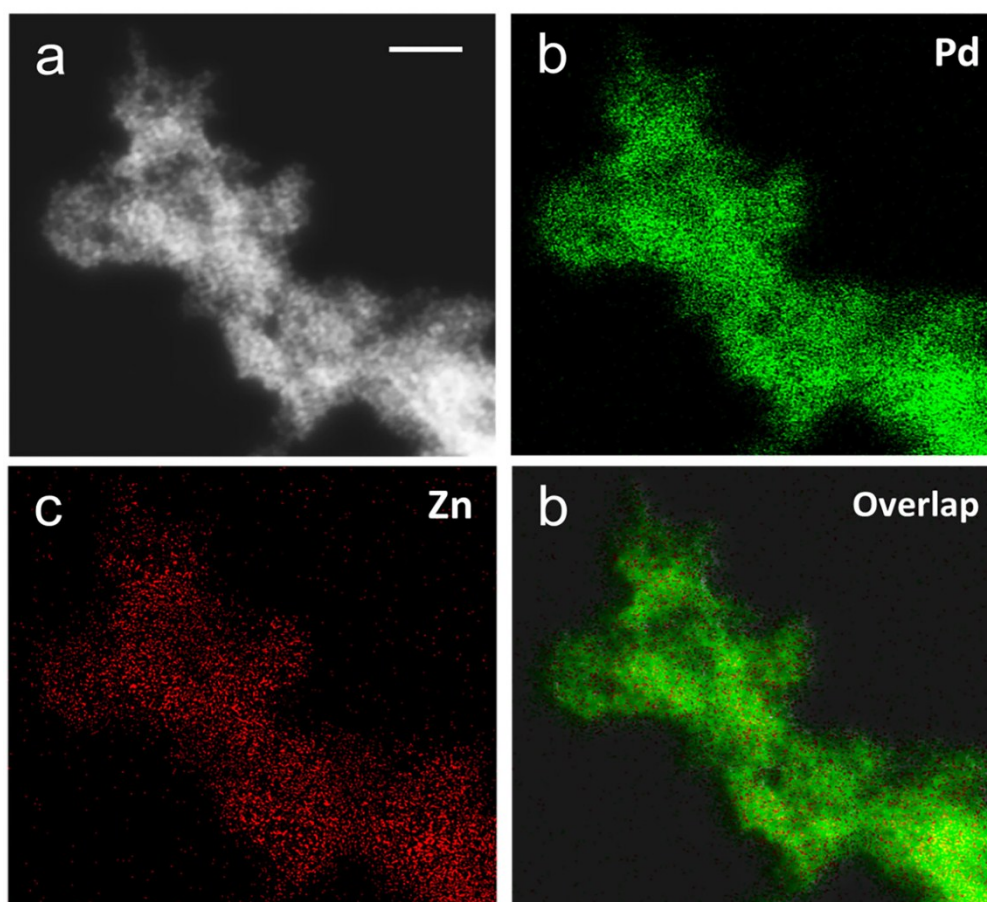

**Fig. S3** (a) HAADF-STEM image of Pd<sub>0.84</sub>Zn<sub>0.16</sub>, (b) Pd mapping in green, (c) Zn mapping in red, and (d) overlapped mapping of Pd and Zn. Scale bar: 200 nm.

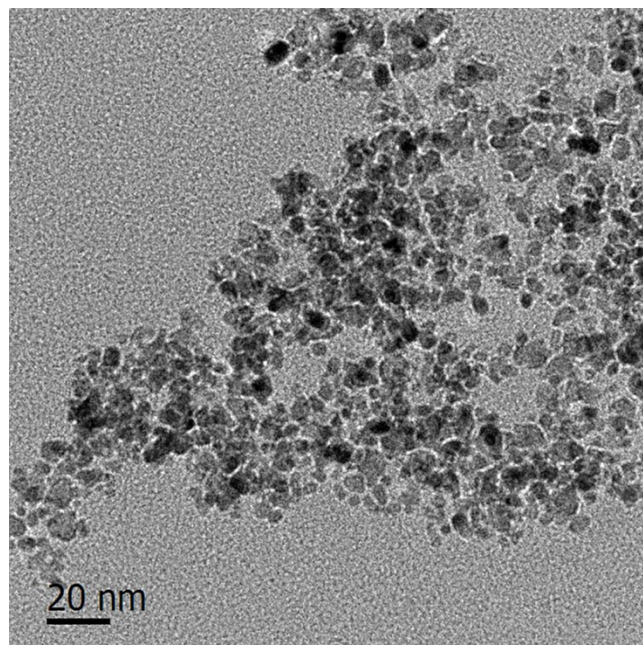

**Fig. S4** TEM image of the irregularity Pd NCs which were synthesized in the absence of Zn precursor.

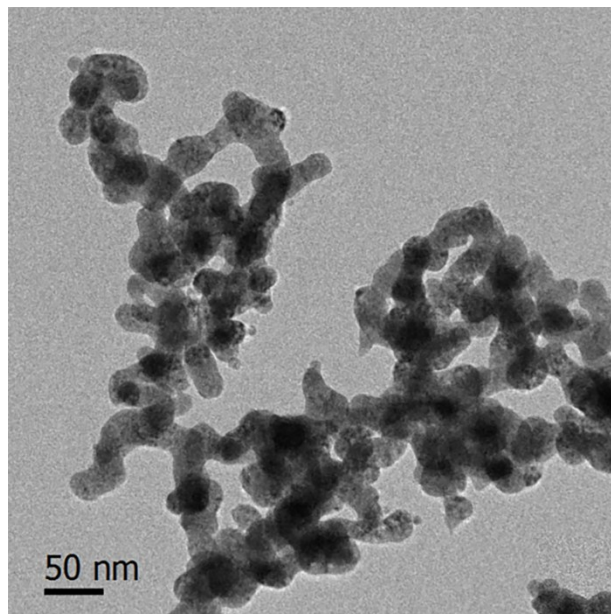

**Fig. S5** TEM image of Pd<sub>0.77</sub>Zn<sub>0.23</sub> NCs alloy which was synthesized in the absence of DMF.

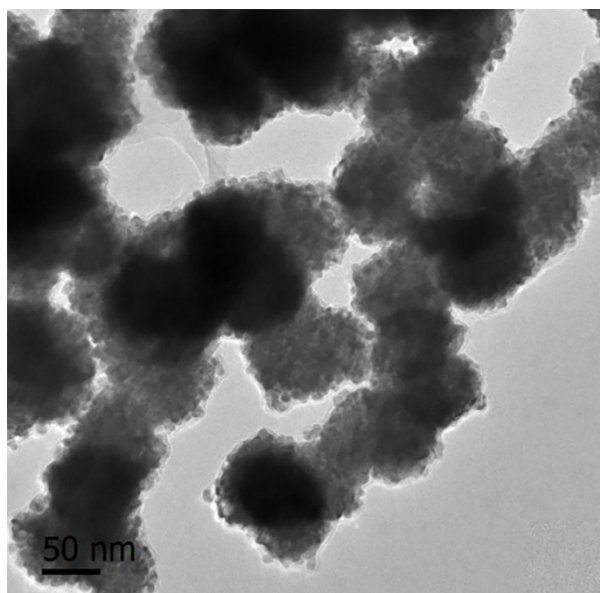

**Fig. S6** TEM image of Pd<sub>0.77</sub>Zn<sub>0.23</sub> NCs alloy which was synthesized in the absence of PVP.



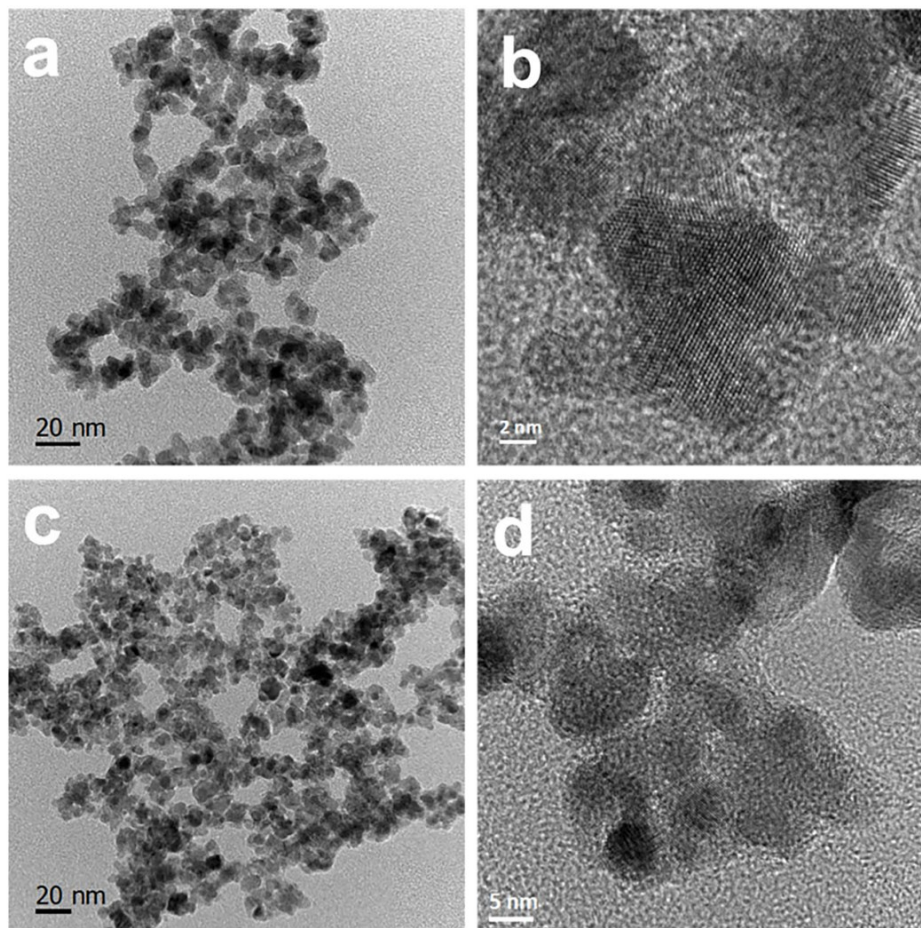

**Fig. S7** The representative TEM images of  $\text{Pd}_{0.77}\text{Zn}_{0.23}$  NCs obtained with different precursor species.

Replacing  $\text{ZnCl}_2$  with (a-b)  $\text{Zn}(\text{NO}_3)_2$  and (c-d)  $\text{Zn}(\text{acac})_2$ .

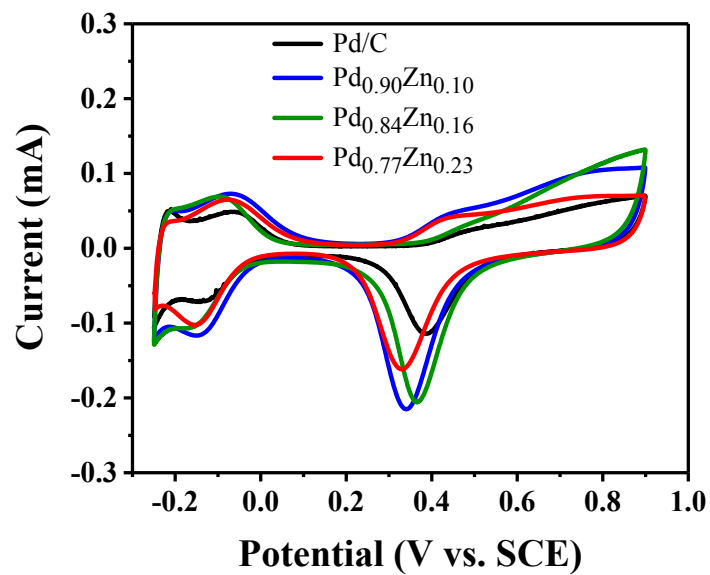

**Fig. S8** CV of the Pd<sub>x</sub>Zn<sub>1-x</sub> NCs and Pd/C catalyst in Ar-saturated in 0.1 M HClO<sub>4</sub> at a scan rate of 50 mV s<sup>-1</sup>.

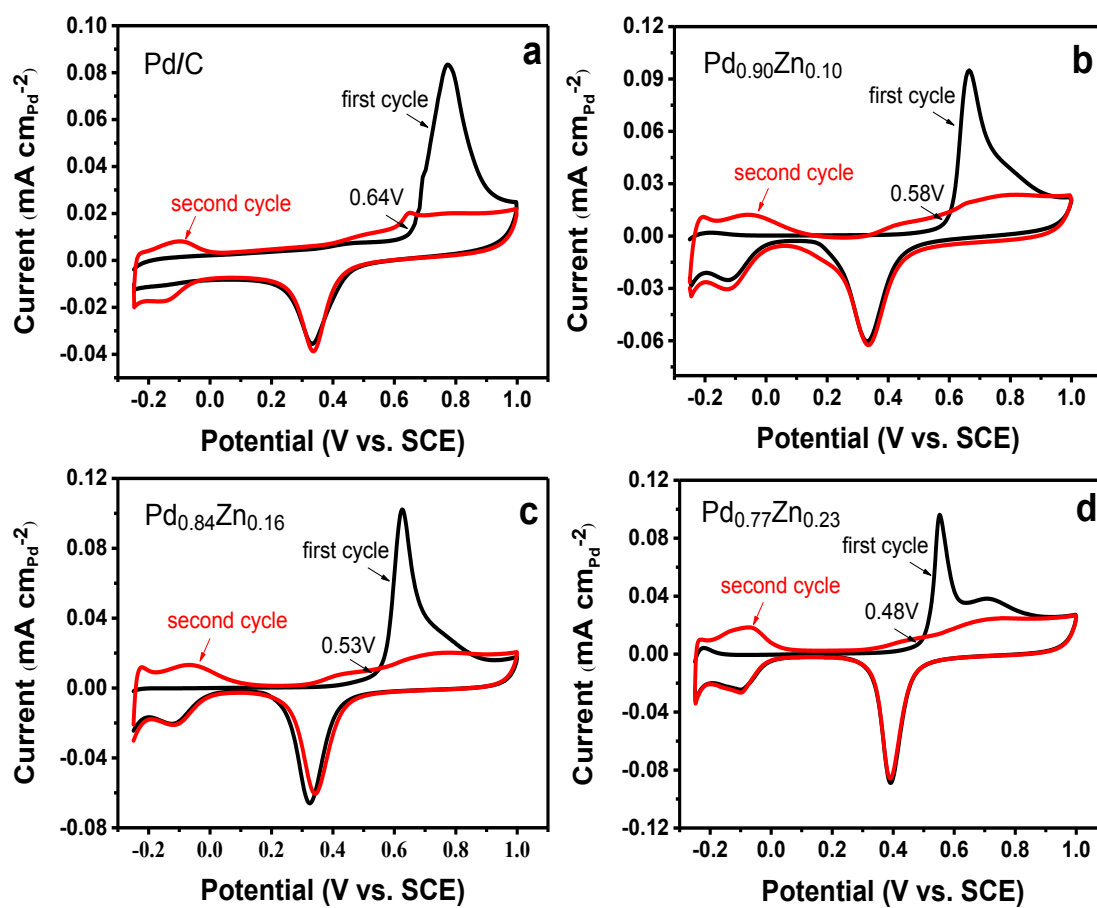

**Fig. S9** CO stripping voltammograms of (a) Pd/C, (b) Pd<sub>0.90</sub>Zn<sub>0.10</sub>, (c) Pd<sub>0.84</sub>Zn<sub>0.16</sub> and (d) Pd<sub>0.77</sub>Zn<sub>0.23</sub> NCs in 0.1 M HClO<sub>4</sub> at a scan rate of 20 mV s<sup>-1</sup>.

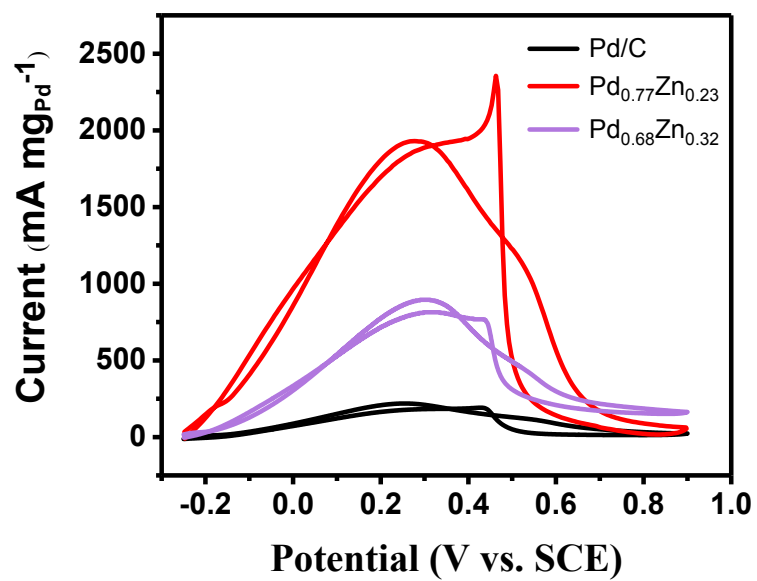

**Fig. S10** CV curves of Pd<sub>0.68</sub>Zn<sub>0.32</sub> and Pd/C catalyst in 0.1 M HClO<sub>4</sub> and 0.5 M HCOOH at a scan rate of 50 mV s<sup>-1</sup>.

**Table S2** Formic acid oxidation behavior on various Pd or Pd-based electrocatalysts is to compare it to Pd-Zn NCs catalysts.

| Catalysts                                 | Test condition                                          | specific activity<br>(mA cm <sub>Pd</sub> <sup>-2</sup> ) | Mass activity<br>(mA mg <sub>Pd</sub> <sup>-2</sup> ) | CO-stripping onset potential (V) | Ref         |
|-------------------------------------------|---------------------------------------------------------|-----------------------------------------------------------|-------------------------------------------------------|----------------------------------|-------------|
| <b>Pd<sub>0.77</sub>Zn<sub>0.23</sub></b> | <b>0.1 M HClO<sub>4</sub> and<br/>0.5 M HCOOH</b>       | <b>13.5</b>                                               | <b>1945.0</b>                                         | <b>0.48</b>                      | <b>this</b> |
| Pd bipyramids                             | 0.5 M HClO <sub>4</sub> and<br>0.5 M HCOOH              | 20.8                                                      | /                                                     | /                                | 1           |
| Pd <sub>3</sub> Pt Half-Shells            | 0.5 M HClO <sub>4</sub> and<br>0.5 M HCOOH              | /                                                         | 318.0                                                 | 0.63                             | 2           |
| np-Pd <sub>50</sub> Cu <sub>50</sub>      | 0.1 M HClO <sub>4</sub> and<br>0.1 M HCOOH              | 6.40                                                      | 640.5                                                 | 0.68                             | 3           |
| Cu-Pd multipods                           | 0.1 M HClO <sub>4</sub> and 1<br>M HCOOH                | 2.14                                                      | /                                                     | 0.89                             | 4           |
| Pd nanochains                             | 0.5 M H <sub>2</sub> SO <sub>4</sub> and<br>0.5 M HCOOH | 40.2                                                      | 283.8                                                 | 0.80                             | 5           |
| CuPd@Pd<br>tetrahedra                     | 0.5 M H <sub>2</sub> SO <sub>4</sub> and<br>0.5 M HCOOH | 4.93                                                      | 501.8                                                 | 0.52                             | 6           |
| PdNiCu/C                                  | 0.5 M H <sub>2</sub> SO <sub>4</sub> and<br>0.5 M HCOOH | 3.30                                                      | 792.0                                                 | 0.70                             | 7           |
| ordered<br>Pd <sub>3</sub> Fe/C           | 0.5 M H <sub>2</sub> SO <sub>4</sub> and<br>0.5 M HCOOH | /                                                         | 696.4                                                 | /                                | 8           |
| Pd-Cu Tripods                             | 0.5 M HClO <sub>4</sub> and<br>0.5 M HCOOH              | 5.81                                                      | 1580.0                                                | /                                | 9           |
| Pd-Cu network                             | 0.5 M H <sub>2</sub> SO <sub>4</sub> and<br>0.5 M HCOOH | 1.50                                                      | 517.0                                                 | /                                | 10          |
| PdNi nanowire                             | 0.5 M H <sub>2</sub> SO <sub>4</sub> and<br>0.5 M HCOOH | /                                                         | 604.3                                                 | /                                | 11          |

|                                          |                                                         |      |        |      |    |
|------------------------------------------|---------------------------------------------------------|------|--------|------|----|
| Pd-Ni-P                                  | 0.5 M H <sub>2</sub> SO <sub>4</sub> and<br>0.5 M HCOOH | /    | 1457.0 | /    | 12 |
| Pd-Fe/RGO                                | 0.1 M H <sub>2</sub> SO <sub>4</sub> and<br>0.5 M HCOOH | 2.71 | 1000.0 | /    | 13 |
| Pd <sub>4</sub> Ni/rGO                   | 0.5 M H <sub>2</sub> SO <sub>4</sub> and<br>0.5 M HCOOH | /    | 1435.0 | /    | 14 |
| Pd-Mo <sub>2</sub> N/rGO                 | 0.5 M H <sub>2</sub> SO <sub>4</sub> and<br>0.5 M HCOOH | 1.03 | 532.7  | 0.82 | 15 |
| PdO/Pd-CeO <sub>2</sub><br>hollow sphere | 0.5 M H <sub>2</sub> SO <sub>4</sub> and<br>0.5 M HCOOH | /    | 1620.0 | 0.69 | 16 |
| PdAu/rGO                                 | 0.5 M H <sub>2</sub> SO <sub>4</sub> and<br>0.5 M HCOOH | 3.67 | 2040.0 | 0.68 | 17 |

#### Ref:

1. S.-I. Choi, J. A. Herron, J. Scaranto, H. Huang, Y. Wang, X. Xia, T. Lv, J. Park, H.-C. Peng, M. Mavrikakis and Y. Xia, *ChemCatChem*, 2015, **7**, 2077-2084.
2. X. Yan, X. Hu, G. Fu, L. Xu, J. M. Lee and Y. Tang, *Small*, 2018, **14**, e1703940.
3. C. X. Xu, Y. Q. Liu, J. P. Wang, H. R. Geng and H. J. Qiu, *J Power Sources*, 2012, **199**, 124-131.
4. D. Chen, P. C. Sun, H. Liu and J. Yang, *J. Mater. Chem. A*, 2017, **5**, 4421-4429.
5. J.-N. Zheng, M. Zhang, F.-F. Li, S.-S. Li, A.-J. Wang and J.-J. Feng, *Electrochimica Acta*, 2014, **130**, 446-452.
6. Y. Chen, Y. Yang, G. Fu, L. Xu, D. Sun, J.-M. Lee and Y. Tang, *J. Mater. Chem. A*, 2018, **6**, 10632-10638.
7. M. Y. Li, R. Q. Liu, G. Y. Han, Y. N. Tian, Y. Z. Chang and Y. M. Xiao, *Chin. J. Chem.*, 2017, **35**, 1405-1410.
8. Z. Liu, G. Fu, J. Li, Z. Liu, L. Xu, D. Sun and Y. Tang, *Nano Res.*, 2018, DOI: 10.1007/s12274-018-2051-7, 1-11.
9. L. Zhang, S.-I. Choi, J. Tao, H.-C. Peng, S. Xie, Y. Zhu, Z. Xie and Y. Xia, *Adv. Funct. Mater.*, 2014, **24**, 7520-7529.
10. F. Yang, Y. Zhang, P. F. Liu, Y. Cui, X. R. Ge and Q. S. Jing, *Int. J. Hydrog. Energy*, 2016, **41**, 6773-6780.
11. D. Bin, B. Yang, F. Ren, K. Zhang, P. Yang and Y. Du, *J. Mater. Chem. A*, 2015, **3**, 14001-14006.
12. X. Liang, B. Liu, J. Zhang, S. Lu and Z. Zhuang, *Chem Commun (Camb)*, 2016, **52**, 11143-11146.
13. A. Feng, J. Bai, W. Shao, W. Hong, Z.-q. Tian and Z. Xiao, *Int. J. Hydrog. Energy*, 2017, **42**, 15196-15202.
14. S. Z. Hu, F. Munoz, J. Noborikawa, J. Haan, L. Scudiero and S. Ha, *Appl. Catal. B-Environ.*, 2016, **180**, 758-765.
15. H. J. Yan, Y. Q. Jiao, A. P. Wu, C. G. Tian, L. Wang, X. M. Zhang and H. G. Fu, *J. Mater. Chem. A*, 2018, **6**, 7623-7630.
16. L. L. Zhang, L. X. Ding, Y. Luo, Y. H. Zeng, S. Q. Wang and H. H. Wang, *Chem. Eng. J.*, 2018, **347**, 193-201.
17. J. Liu, Y. Zheng, Z. Hong, K. Cai, F. Zhao and H. Han, *Sci. Adv.*, 2016, **2**.
